# Supplementary material for: Interaction of [RuIII(edta)(H2O)]– with amino acids in aqueous solution. Equilibrium, kinetic and protease inhibition studiesElectronic supplementary information (ESI) available: kinetic plots and a scheme showing the reaction between [RuIII(edta)(H2O)]– and cysteine. See http://www.rsc.org/suppdata/dt/b2/b208495n/
Source: Royal Society of Chemistry journal article supplement (doi:10.1039/b208495n), 2002-12-10

## Supporting Information

### Interaction of $[\text{Ru}^{\text{III}}(\text{edta})(\text{H}_2\text{O})]^-$ with amino acids in aqueous solution. Equilibrium, kinetic and protease inhibition studies

Debabrata Chatterjee,\* Mohamed S. A. Hamza, Mohamed M. Shoukry,  
Anannya Mitra, Sreerupa Deshmukh and Rudi van Eldik\*

Scheme I

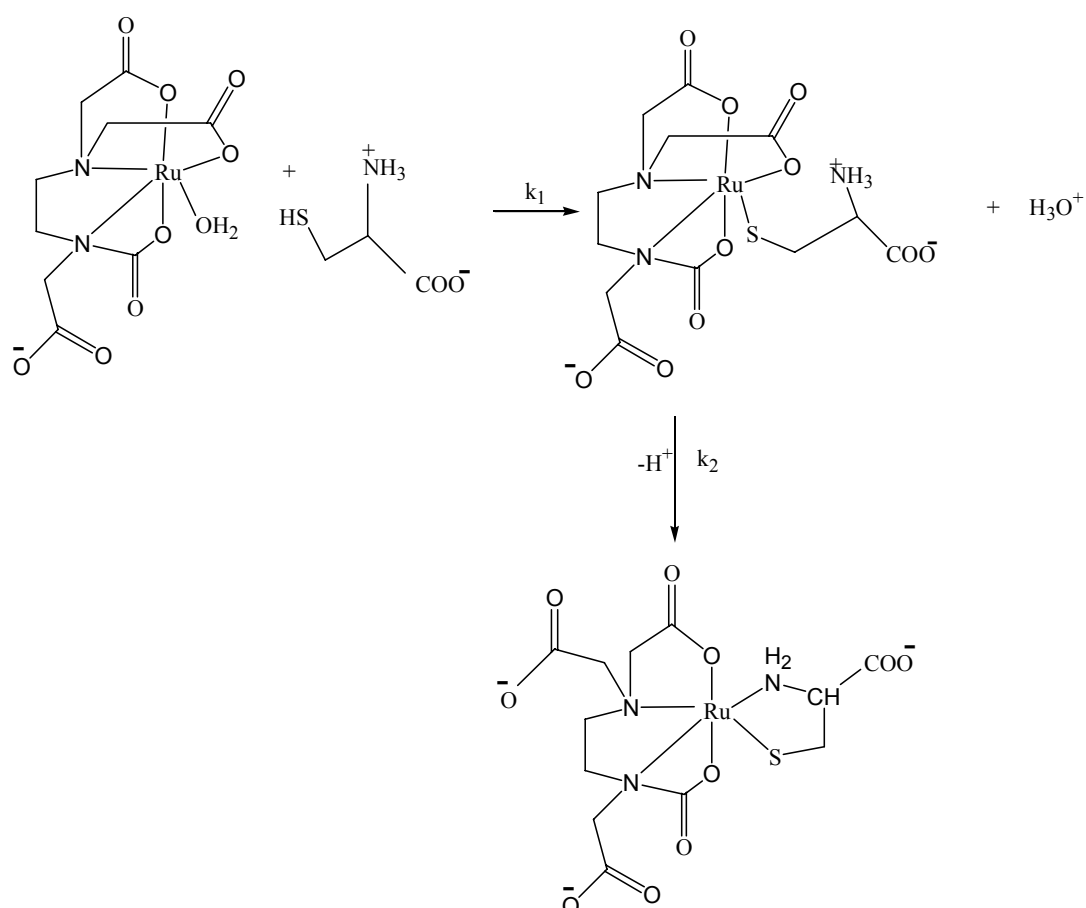

Figure SI-1. Typical kinetic trace for the reaction between  $5 \times 10^{-4}$  M  $[\text{Ru}(\text{edta})\text{H}_2\text{O}]^-$  and 0.05 M glycine, pH 6.0 (phosphate buffer) and 25.0 °C. The trace was fitted to two exponentials by following the decrease in absorbance at 390 nm. The lower trace represents the difference between the experimental and calculated curves.

Figure SI-2. Typical kinetic trace for the reaction between  $5 \times 10^{-4}$  M  $[\text{Ru}(\text{edta})\text{H}_2\text{O}]^-$  and 0.05 M glycine, pH 6.0 (phosphate buffer) and 25.0 °C. The trace was fitted to a single exponential by following the decrease in absorbance at 390 nm. The lower trace represents the difference between the experimental and calculated curves.

Figure SI-3. Plot of  $k_{\text{obs}}$  versus [glycine] for the reaction between  $[\text{Ru}(\text{edta})\text{H}_2\text{O}]^-$  and glycine. Experimental conditions:  $[\text{Ru}(\text{edta})\text{H}_2\text{O}]^- = 5 \times 10^{-4}$  M, pH 6.0, 25.0 °C and  $I = 0.1$  M ( $\text{NaNO}_3$ ).

Figure SI-4. Plot of  $k_{\text{obs}}$  versus [cysteine] for the reaction between  $[\text{Ru}(\text{edta})\text{H}_2\text{O}]^-$  and cysteine. Experimental conditions:  $[\text{Ru}(\text{edta})\text{H}_2\text{O}]^- = 2.5 \times 10^{-4}$  M, pH 6.0, 25.0 °C and  $I = 0.1$  M ( $\text{NaNO}_3$ ).

Figure SI-5. Typical kinetic trace for the reaction between  $2.5 \times 10^{-4}$  M  $[\text{Ru}(\text{edta})\text{H}_2\text{O}]^-$  and 0.02 M S-methylcysteine, pH 6.0 and 15.0 °C. The trace was fitted to one exponential by following the decrease in absorbance at 335 nm. The lower trace represents the difference between the experimental and calculated curves.

Figure SI-1

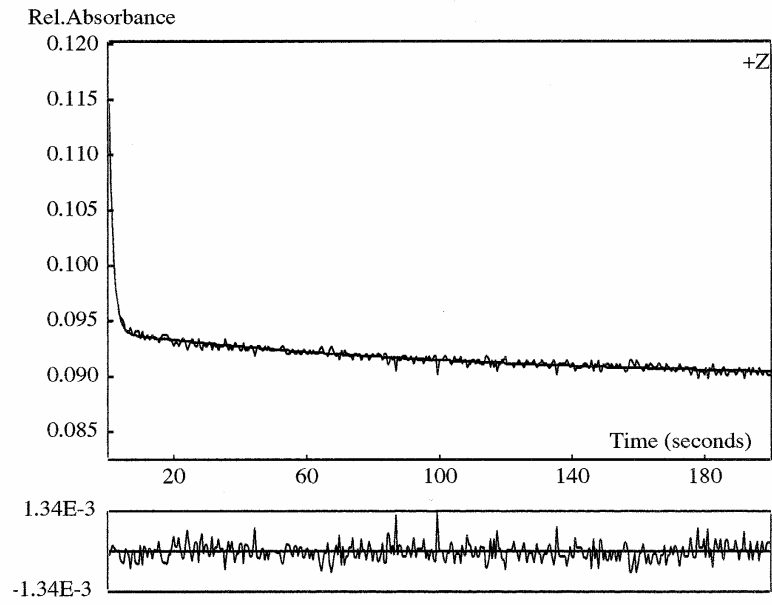

Figure SI-2

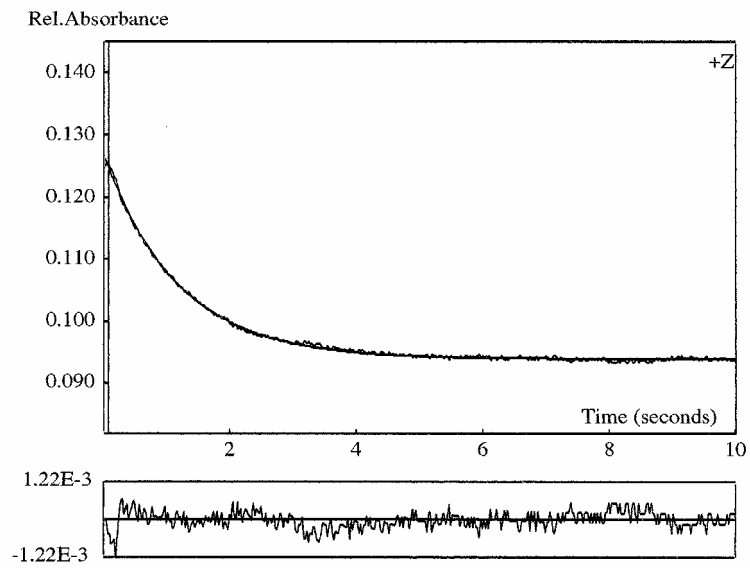

Figure SI-3

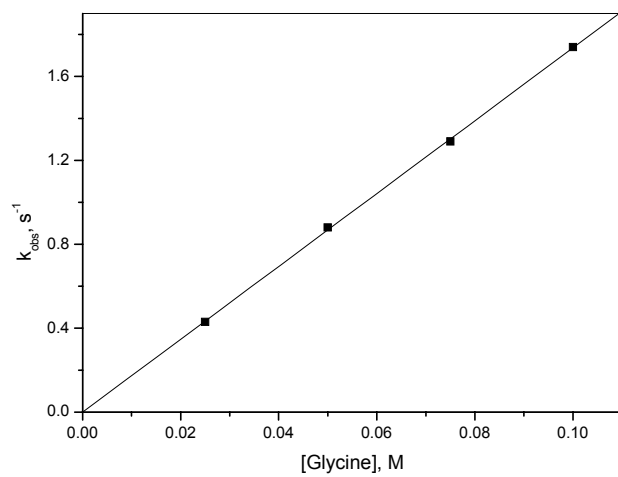

Figure SI-4

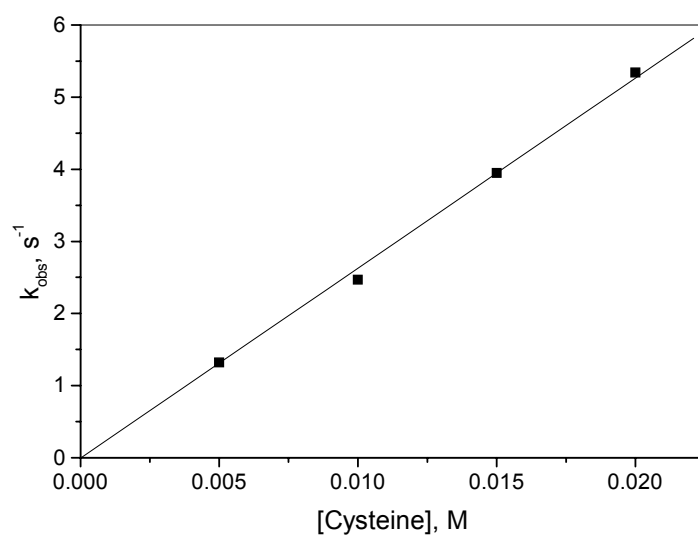

Figure SI-5

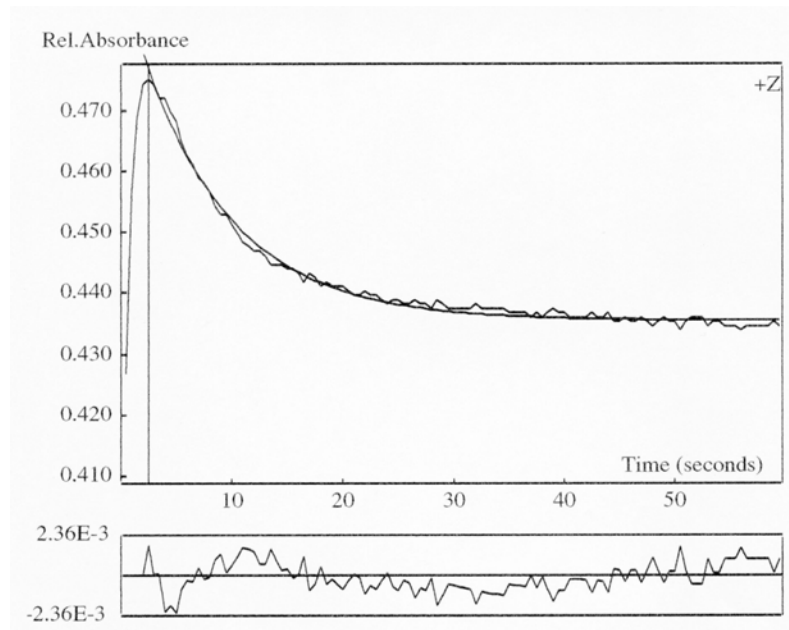

Supplement: b208495n.pdf [file b208495n.pdf]
